# Supplementary material
Source: PubMed Central journal article supplement (PMC2034268)

Time: 0 20 40 min

Ca<sup>2+</sup>

-

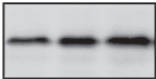

+

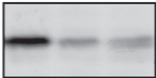

WB: Cyclin B2

Supplement: pnas_0707537104_1.pdf [file pnas_0707537104_1.pdf]

control  
morpholino

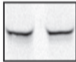

IP: [<sup>35</sup>S] Cyclin B2

control  
morpholino

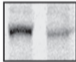

IP: [<sup>35</sup>S] Emi2

Supplement: pnas_0707537104_2.pdf [file pnas_0707537104_2.pdf]

**A**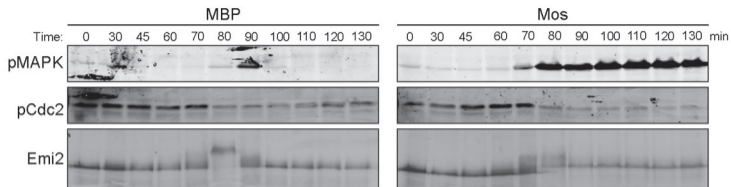**B**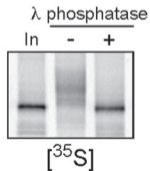**C**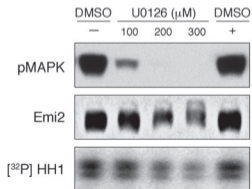

Supplement: pnas_0707537104_3.pdf [file pnas_0707537104_3.pdf]

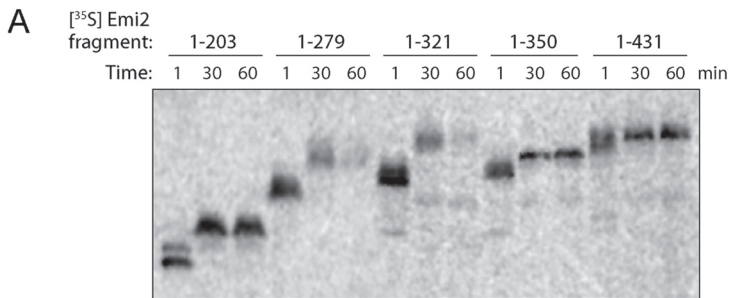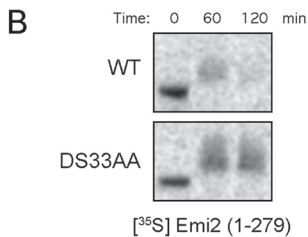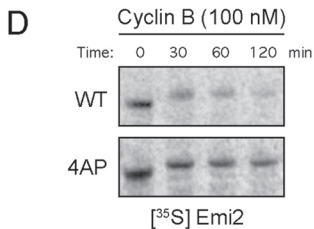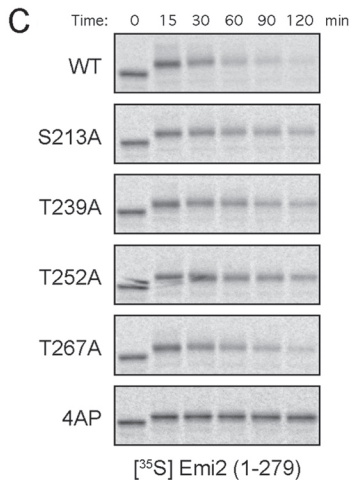

Supplement: pnas_0707537104_4.pdf [file pnas_0707537104_4.pdf]

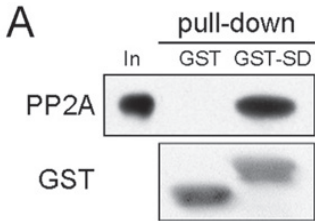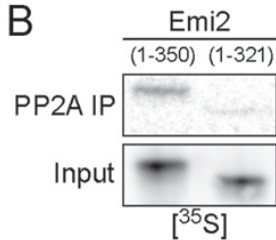

Supplement: pnas_0707537104_5.pdf [file pnas_0707537104_5.pdf]
